# Supplementary material for: Akirin2 is modulated by miR-490-3p and facilitates angiogenesis in cholangiocarcinoma through the IL-6/STAT3/VEGFA signaling pathway
Source: PubMed Central journal article supplement (PMC6423123; doi:10.1038/s41419-019-1506-4), 2019-03-18

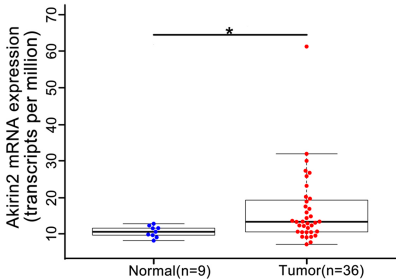

Supplement: 41419_2019_1506_MOESM1_ESM.pdf [file 41419_2019_1506_MOESM1_ESM.pdf]
